# Supplementary material
Source: Springer Nature journal article supplement (https://www.springermedizin.de/resource/supplementary/13058_2013_3581_MOESM2_ESM.pdf/9703860)
Supplement: MOESM2 [file 9703860]

**(A) All Subtypes**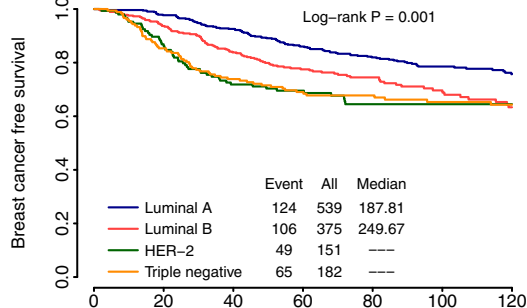

| No. of patients at risk |                 | Follow-up time (months) |     |     |     |     |     |     |
|-------------------------|-----------------|-------------------------|-----|-----|-----|-----|-----|-----|
|                         |                 | 0                       | 20  | 40  | 60  | 80  | 100 | 120 |
| 539                     | Luminal A       | 505                     | 460 | 374 | 294 | 208 | 142 | 142 |
| 375                     | Luminal B       | 337                     | 290 | 208 | 140 | 86  | 64  | 64  |
| 151                     | HER-2           | 123                     | 99  | 80  | 57  | 42  | 33  | 33  |
| 182                     | Triple negative | 149                     | 127 | 109 | 88  | 69  | 58  | 58  |

**(B) Luminal A + Luminal B**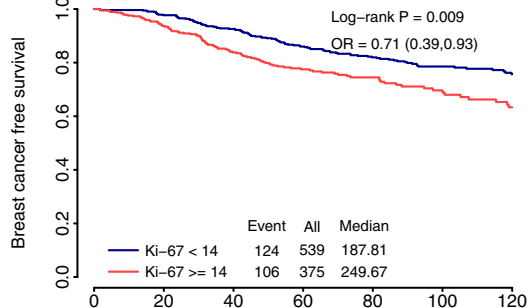

| No. of patients at risk |             | Follow-up time (months) |     |     |     |     |     |     |
|-------------------------|-------------|-------------------------|-----|-----|-----|-----|-----|-----|
|                         |             | 0                       | 20  | 40  | 60  | 80  | 100 | 120 |
| 539                     | Ki-67 < 14  | 505                     | 460 | 374 | 294 | 208 | 142 | 142 |
| 375                     | Ki-67 >= 14 | 337                     | 290 | 208 | 140 | 86  | 64  | 64  |

**(C) HER-2**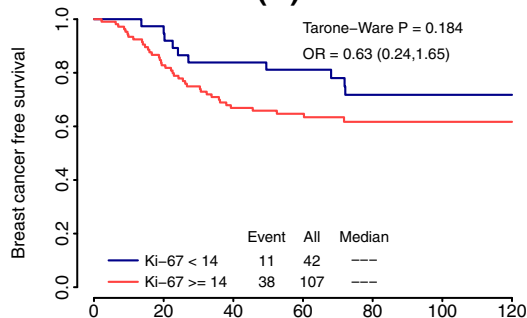

| No. of patients at risk |             | Follow-up time (months) |    |    |    |    |     |     |
|-------------------------|-------------|-------------------------|----|----|----|----|-----|-----|
|                         |             | 0                       | 20 | 40 | 60 | 80 | 100 | 120 |
| 42                      | Ki-67 < 14  | 36                      | 31 | 27 | 21 | 18 | 14  | 14  |
| 107                     | Ki-67 >= 14 | 85                      | 66 | 51 | 34 | 23 | 18  | 18  |

**(D) Triple negative**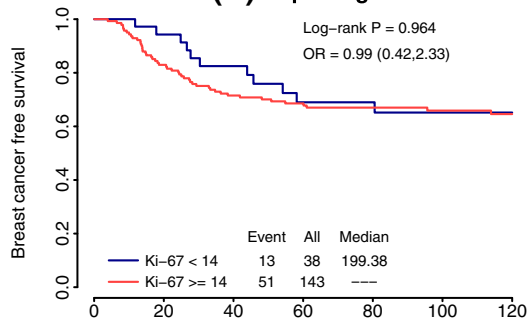

| No. of patients at risk |             | Follow-up time (months) |     |    |    |    |     |     |
|-------------------------|-------------|-------------------------|-----|----|----|----|-----|-----|
|                         |             | 0                       | 20  | 40 | 60 | 80 | 100 | 120 |
| 38                      | Ki-67 < 14  | 32                      | 26  | 20 | 18 | 14 | 12  | 12  |
| 143                     | Ki-67 >= 14 | 116                     | 100 | 88 | 69 | 55 | 46  | 46  |
